# Supplementary material for: CaSBP11 Participates in the Defense Response of Pepper to Phytophthora capsici through Regulating the Expression of Defense-Related Genes
Source: PubMed Central journal article supplement (PMC7729508; doi:10.3390/ijms21239065), 2020-11-28
Supplement: ijms-21-09065-s001.pdf [file ijms-21-09065-s001.pdf]

## SUPPLEMENTARY TABLES AND FIGURES

**Supplementary Figure S1.** Phenotype and silencing efficiency of *CaSBP11*-silenced plant. (A) Phenotypes of *CaSBP11*-silenced, positive control (*TRV2:CaPDS*), and negative control (*TRV2:00*) plants. Photographs were taken forty days after injection. The diameter of the pot is 15 cm. (B) The silencing efficiency of *CaSBP11* in the silenced and negative control plants. Bars with different lower-case letters indicate significant differences at  $p < 0.05$ .

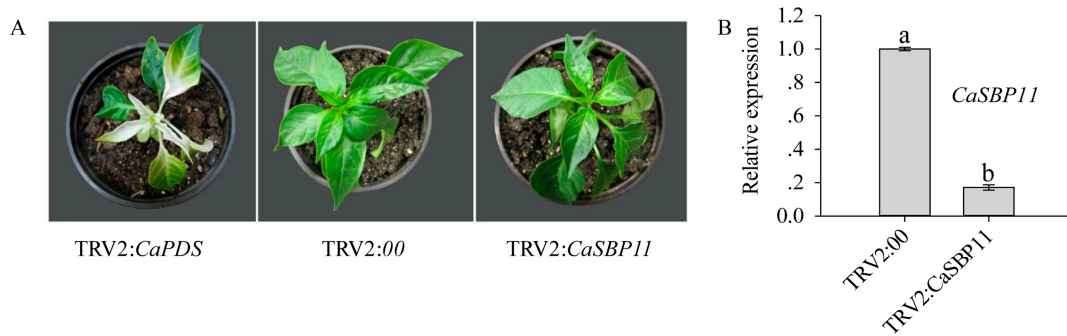

**Supplementary Figure S2.** The symptom-based scale used for the disease of *CaSBP11*-silenced and control plants category. level 0, no symptoms; level 1, the lower leaves of the plant turned yellow or wilted; level 2, the lower leaves of the plant have an obvious deciduous phenomenon or the whole plant wilted; level 3, blackening of stem base and all leaves have fallen off except at growth points; level 4, the whole plant is dead.

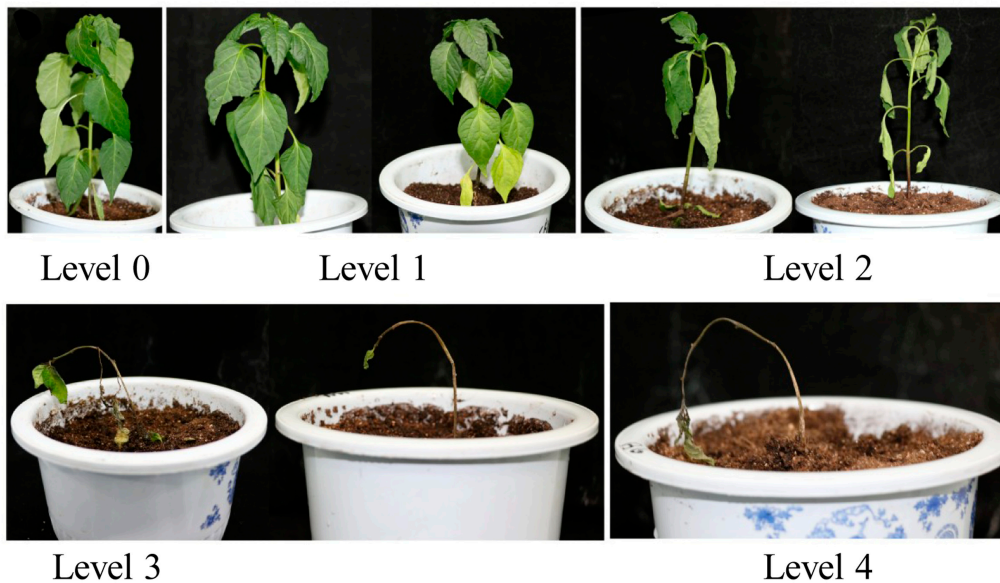

**Supplementary Figure S3.** Screening of *sid2-2*, *coil-21* and *coil-22* homozygous lines. The left primer (LP) and right primer (RP) combination and the T-DNA insertion site primer (LB1.3) and right primer (RP) combination were used to detect 12 *sid2-2* lines respectively. Only 3, 9 and 12 lines had no bands in the combination of LP and RP, while there were bands in the combination of LB1.3 and RP. Therefore, homozygous strain 3 was selected for the further study. The homozygous lines of *coil-21* and *coil-22* were screened by *HpaII* and *BamHI* restriction endonucleases respectively. There are 3 heterozygous lines in *coil-21* strain, and all of *coil-22* lines are homozygous lines.

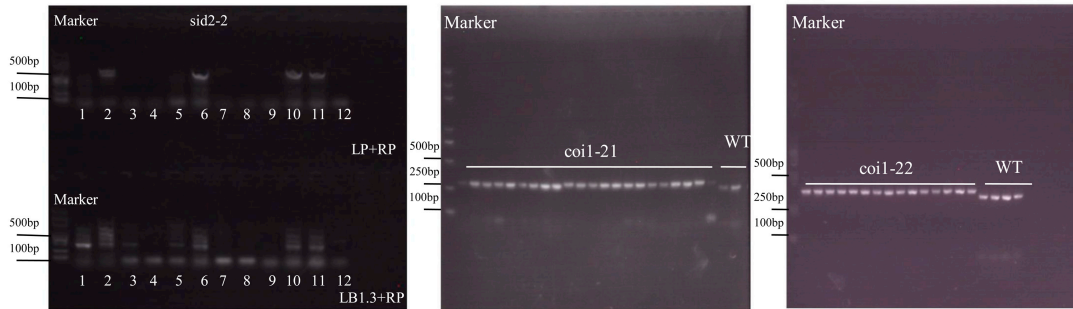

**Supplementary Figure S4.** Overexpression of *CaSBP11* in *Arabidopsis* and *NahG*-overexpression lines, *sid2-2*, *coil-21*, and *coil-22* lines. The expression levels of *CaSBP11* in these described *Arabidopsis* were detected. The expression levels of *NahG* in *NahG*-overexpression lines, and *NahG* and *CaSBP11* hybrid lines were detected. The means were analyzed using the least significant difference (LSD). \* and \*\* represent significant differences at  $p < 0.05$  and  $p < 0.01$  respectively. Mean values and SDs for three replicates are shown.

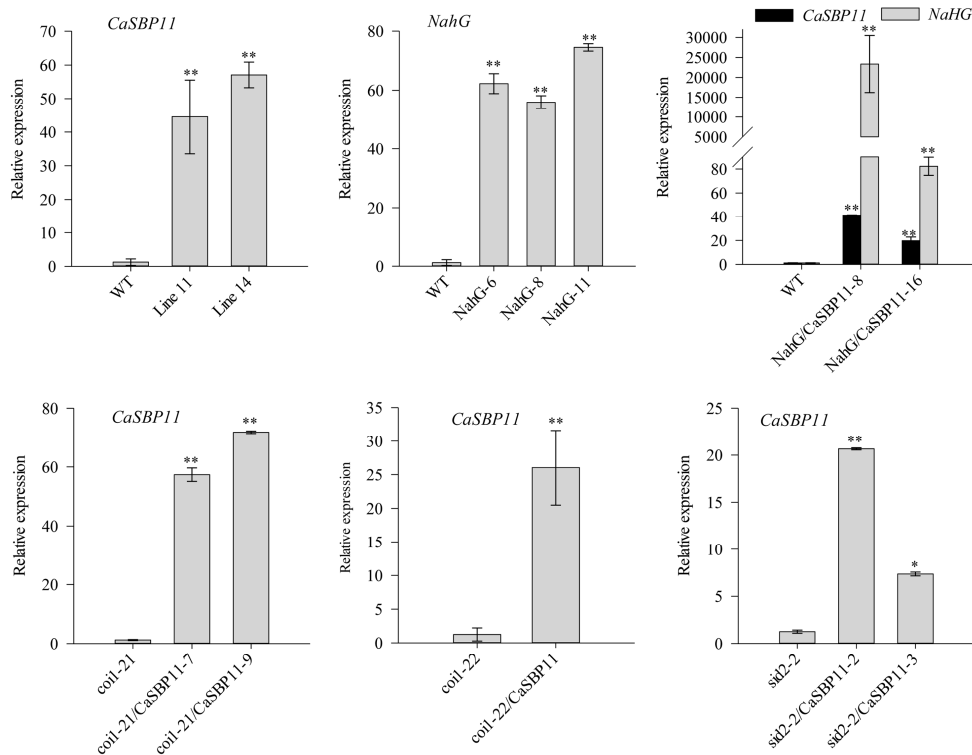

**Supplementary Figure S5.** Expression of the salicylic acid, jasmonate and ethylene signal pathways genes in *CaSBP11* overexpressing lines of *Arabidopsis thaliana*. The means were analyzed using the least significant difference (LSD). Bars with different lower-case letters indicate significant at  $p < 0.05$ . Mean values and SDs for three replicates are shown.

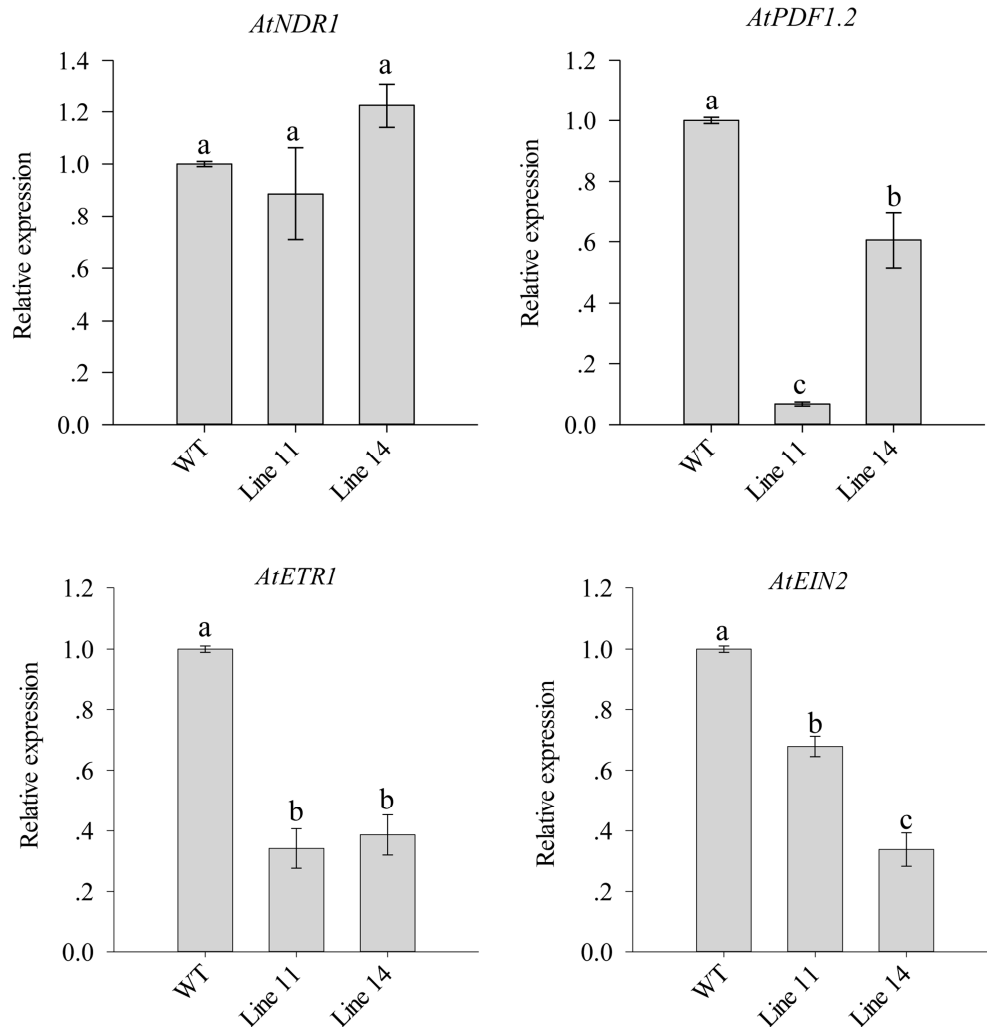

**Supplementary Figure S6.** Expression of the salicylic acid signaling pathway-related genes in *NahG*-overexpressing lines (NahG-6, NahG-8, and NahG-11 ), *NahG* and *CaSBP11* hybrid lines (NahG/*CaSBP11*-8 and NahG/*CaSBP11*-16), *sid2-2* lines and *CaSBP11* overexpression in *sid2-2* lines (*sid2-2*/*CaSBP11*-2 and *sid2-2*/*CaSBP11*-2 ). The means were analyzed using the least significant difference (LSD). Bars with different lower-case letters indicate significant at  $p < 0.05$ . Mean values and SDs for three replicates are shown.

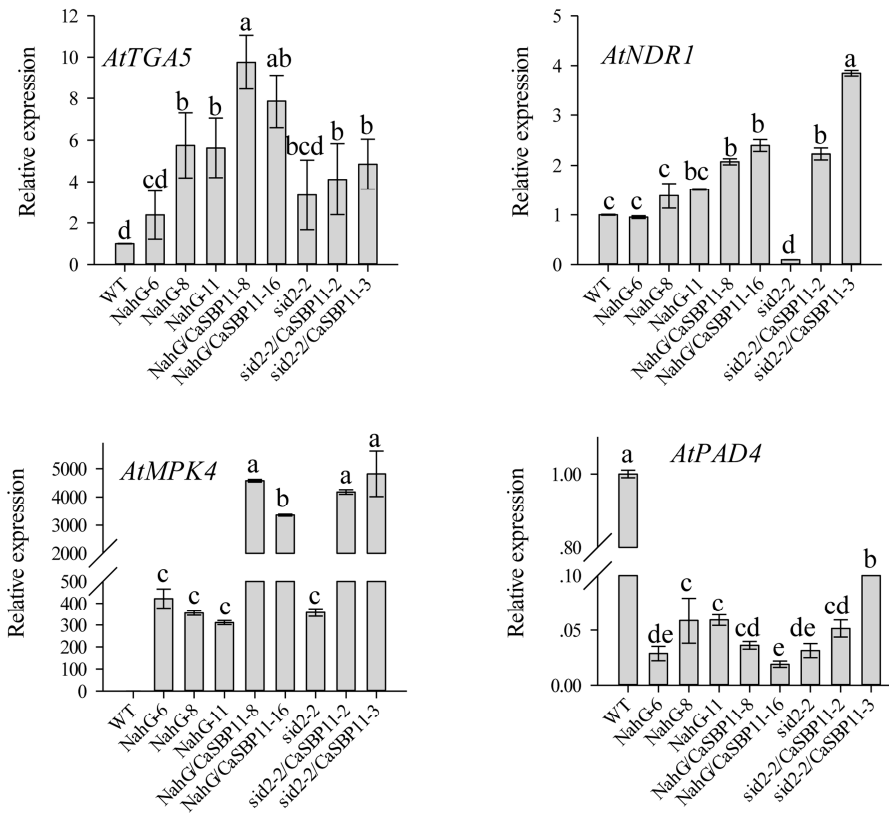

**Supplementary Figure S7.** Partial pattern of salicylic acid and jasmonate signalling related gene in *Arabidopsis* [38,39,51-58]. Arrows indicate positive regulation, while those without arrows indicate negative regulation.

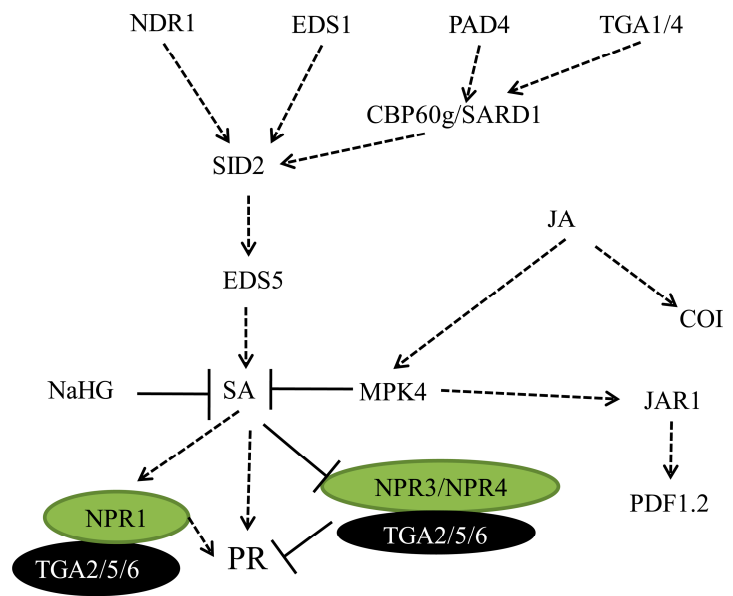

**Supplementary Table S1.** Primers names and their sequences used for vector construction and mutation detection in this study.

| <b>Oligo Name</b> | <b>Primer Abbreviation</b> | <b>Primer Sequence (5'3')</b>             |
|-------------------|----------------------------|-------------------------------------------|
| <i>CaSBP11</i>    | CaSBP11-2307-GFP-F         | CGGGATCCATGGAGTCTTGGAGTTATTTCTCAGG        |
|                   | CaSBP11-2307-GFP-R         | TCCCCCGGGCAGTGATTCTAAGGCCGGG              |
|                   | CaSBP11-VIGS-F             | CGGGATCCAGGACTGCCTGCCGTAACAAC             |
|                   | CaSBP11-VIGS-R             | GGGGTACCGACGAGCCCTGTGATTGAGATG            |
| <i>NaHG</i>       | NaHG-F                     | GCTCTAGAATGAAAAACAATAAACTTGGCTT           |
|                   | NaHG-R                     | CGGGATCCTCACCCCTGACGTAGCGC                |
| <i>coi1-21</i>    | CS68754-F                  | GACAACACTTGTTGTTTTTCTTCAGACAAGGAATGTAACCG |
|                   | CS68754-R                  | GGTCGAGTAAGACAAGGCGGAAGTCACAGAGGTT        |
| <i>coi1-22</i>    | CS68755-F                  | CTGTAAGCAGTTGAAGCGGCTGAGGATTGAA           |
|                   | CS68755-R                  | GTCTCAGATAGAATGCAAATCGTCTGAGTTTCTTGGAT    |
| <i>sid2-2</i>     | LB1.3-F                    | GTTCCGAAATCGGCAAAT                        |
|                   | LP                         | AAATTTTGGGGAAATTGTTGC                     |
|                   | RP                         | ATTGAAGTGAAGCCATTGCAG                     |

**Supplementary Table S2.** Primers names and their sequences used in this study for quantitative PCR.

| <b>Oligo Name</b> | <b>Primer Abbreviation</b> | <b>Primer Sequence (5'3')</b> |
|-------------------|----------------------------|-------------------------------|
| <i>CaSBP11</i>    | RTCaSBP11-VIGS-F           | CATCTCAATCACAGGGCTCG          |
|                   | RTCaSBP11-VIGS-R           | CATTACTATCCTGCTTCACTTGC       |
| <i>Nbactin-97</i> | NbACTIN-F                  | TATGGAAACATTGTGCTCAGTGG       |
|                   | NbACTIN-R                  | CCAGATTCGTCATACTCTGCC         |
| <i>CaActin2</i>   | CaActin2-F                 | TCCACCTCTTCACTCTCTGCTC        |
|                   | CaActin2-R                 | TGACCCATCCCTACCATAACAC        |
| <i>CaPO1</i>      | CAPO1-F                    | GGCGCCAGGATTGCTGACAA          |
|                   | CAPO1-R                    | GTGGACATAATCCTCGAAGC          |
| <i>CaDEF1</i>     | CADEF-F                    | CAAGGGAGTATGTGCTAGTGAGAC      |
|                   | CADEF-R                    | TGCACAGCACTATCATTGCATAC       |

---

|                 |             |                         |
|-----------------|-------------|-------------------------|
| <i>CaSAR8.2</i> | CASAR82-F   | CAGGGAGATGAATTCTGAGGC   |
|                 | CASAR82-R   | CATATGAACCTCTATGGATTCTG |
| <i>CaBPR1</i>   | CAPR1-F     | CAGGATGCAAACTCTGGTGG    |
|                 | CAPR1-R     | ATCAAAGGCCGGTTGGTC      |
| <i>NbDEF</i>    | NbDEF-RT-F  | AACTTGTGAGTCCCAGAG      |
|                 | NbDEF-RT-R  | GGATACCTTTCTACCACC      |
| <i>NbNPR1</i>   | NbNPR1-RT-F | TTACTTCACTGAAACGCCT     |
|                 | NbNPR1-RT-R | CACTTCCTTTAATTCCACCT    |
| <i>NbPR1a</i>   | NbPR1a-RT-F | GTAATATCCCCTCTTGCCG     |
|                 | NbPR1a-RT-R | ATGAAATCGCCACTTCCCTC    |
| <i>NbPR1b</i>   | NbPR1b-RT-F | TCAAGCTCAAACTCTCCCC     |
|                 | NbPR1b-RT-R | CCACATCTTTACTGCTCCCG    |
| <i>NaHG</i>     | RTnahg-F    | TGCGTAGTCATGTGCTGGAAG   |
|                 | RTnahg-F    | GTTCCGGCTTCGGCTCACTA    |
| <i>AtNPR1</i>   | AtNPR1-F    | CGTCGCTACCGATAACAC      |
|                 | AtNPR1-R    | AACCGACTTCGTAATCCTT     |
| <i>AtNPR3</i>   | AtNPR3-F    | TTCACGGGTTTGTACCTCC     |
|                 | AtNPR3-R    | TCGACCAGTCTCAACTGTTTTTC |
| <i>AtNPR4</i>   | AtNPR4-F    | TTCCCAGCAGAAGCCAATGT    |
|                 | AtNPR4-R    | TTCCCAGCAGAAGCCAATGT    |
| <i>AtPR1</i>    | AtPR1-F     | ACGGGGAAAACCTTAGCCTGG   |
|                 | AtPR1-R     | TTGGCACATCCGAGTCTCAC    |
| <i>AtPAD4</i>   | AtPAD4-F    | TATGGTCGACGCTGCCATAC    |
|                 | AtPAD4-R    | CACGTGGCAGAAGTTGTGTG    |
| <i>AtEDS1</i>   | AtEDS1-F    | GAAGAAGCAGGAGCAGTCGT    |
|                 | AtEDS1-R    | CCACAGAAGCTTGAAATGAGGT  |
| <i>AtEIN2</i>   | AtEIN2-F    | CAAATGCACAACCGCAGTCA    |
|                 | AtEIN2-R    | CGCTTCAAAAACCGAAGCCAA   |
| <i>AtMPK4</i>   | AtMPK4-F    | AAGCTCGGGTGATCAAAGCA    |

---

---

|                 |            |                          |
|-----------------|------------|--------------------------|
|                 | AtMPK4-R   | ATTTGAGCCCACGCAACAAC     |
| <i>AtEDS5</i>   | AtEDS5-F   | TTCGGTCCTTGGGCTGTTAC     |
|                 | AtEDS5-R   | CTGTGAAGCAGTTGTTGCC      |
| <i>AtETR1</i>   | AtETR1-F   | CCGGGGTCGAAAACACTACCAA   |
|                 | AtETR1-R   | GGTTTGAGCAACACACCGTC     |
| <i>AtPDF1.2</i> | AtPDF1.2-F | TCTCTTTGCTGCTTTCGACG     |
|                 | AtPDF1.2-R | CCCTGACCATGTCCCACTTG     |
| <i>AtNDR1</i>   | NDR1-F     | TGAAGACACAGAAGGTGGTCCG   |
|                 | NDR1-R     | GTCTTTTCCGAGGGCAGGAA     |
| <i>AtSARD1</i>  | SARD1-F    | TCCTCTCGCCACATCAACAC     |
|                 | SARD1-R    | GGCTCGCAGCATATTGTTGG     |
| <i>AtCBP60G</i> | CBP60G-F   | TGCCATGGATTGCGTTTTGG     |
|                 | CBP60G-R   | GGATCCAAACTTCCTTGAAAGTCG |
| <i>AtTGA2</i>   | AtTGA2-F   | AATGCGCATGCAGGTGATTC     |
|                 | AtTGA2-R   | TTGAACCAAGAGTCCCGCTC     |
| <i>AtTGA5</i>   | AtTGA5-F   | AGGGCATTGGGTATCGGTG      |
|                 | AtTGA5-R   | GCTTTTCCTTGCAGCCTCAC     |
| <i>AtTGA6</i>   | AtTGA6-F   | GAGCAAGACAGCAGGGAGTT     |
|                 | AtTGA6-R   | ATGGGCTCTAGCTGATTTCGC    |
| <i>AtTGA4</i>   | AtTGA4-F   | TCGGATCTTAACCACGCGAC     |
|                 | AtTGA4-R   | TACGTTGGTTCACGTTGCCT     |
| <i>AtActin2</i> | AtActin2-F | CGCTCTTTCTTTCCAAGCTCAT   |
|                 | AtActin2-R | GCAAATCCAGCCTTCACCAT     |

---
